# Supplementary material
Source: MDPI journal article supplement (https://www.mdpi.com/2072-4292/12/11/1897)
Supplement: s1 [file s1]

# Supplementary material

## S1. Land cover map from MCD12Q1 and the blue-sky albedo from MCD43A3 over the other 8 AmeriFlux sites

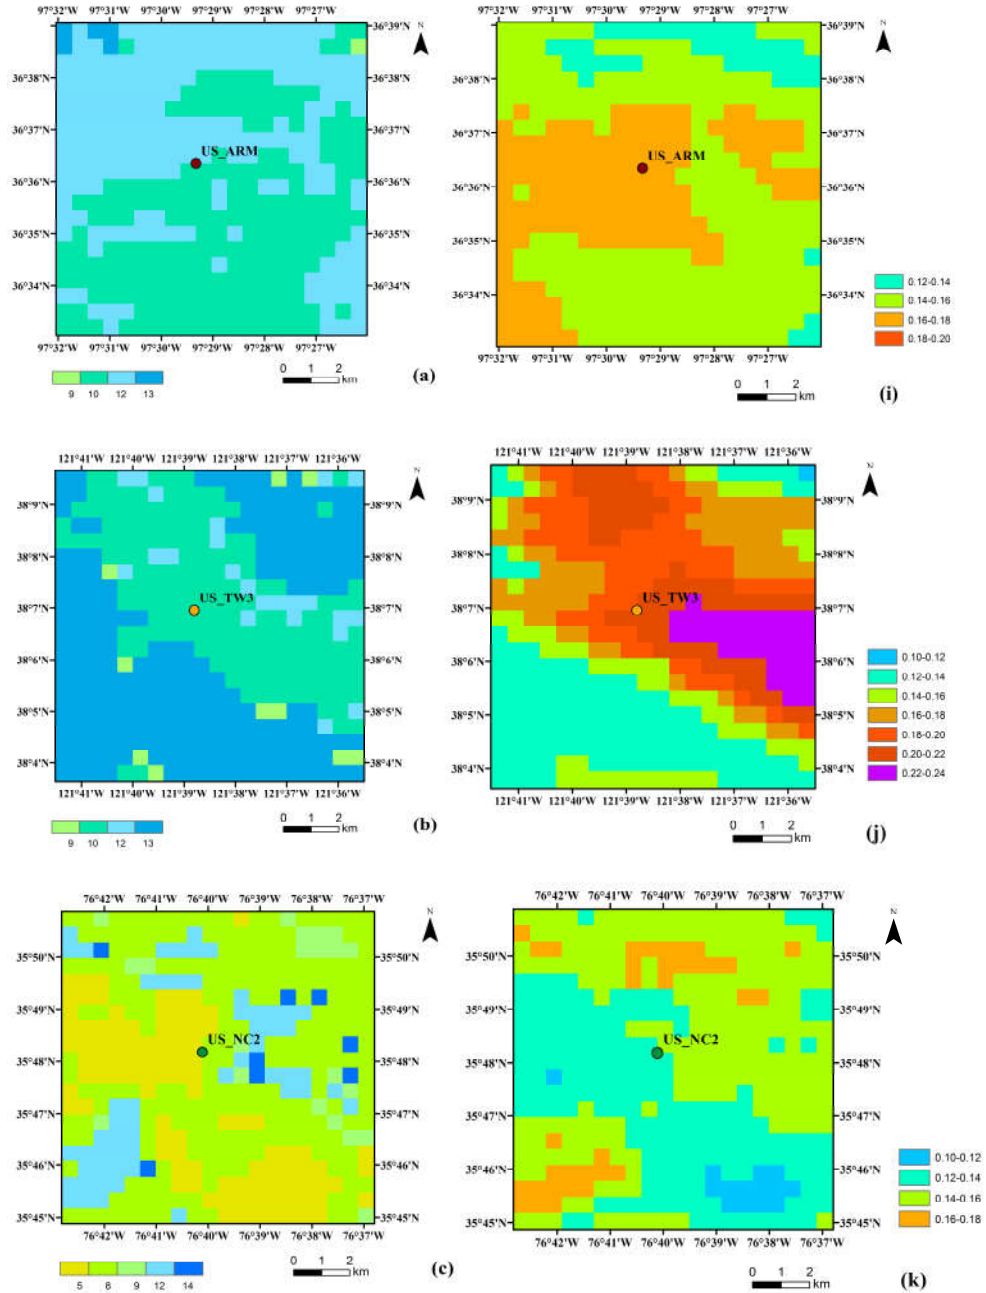

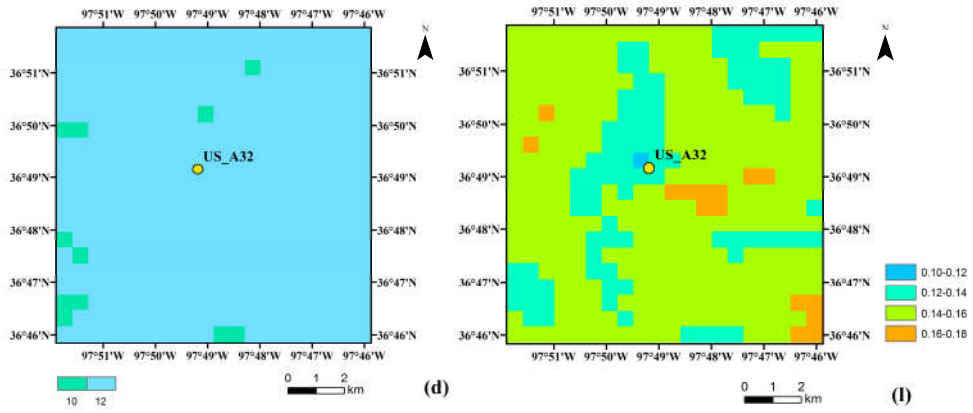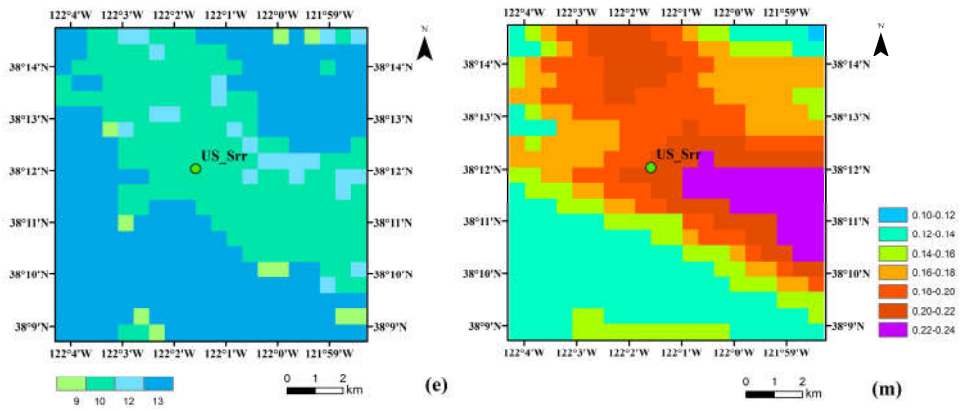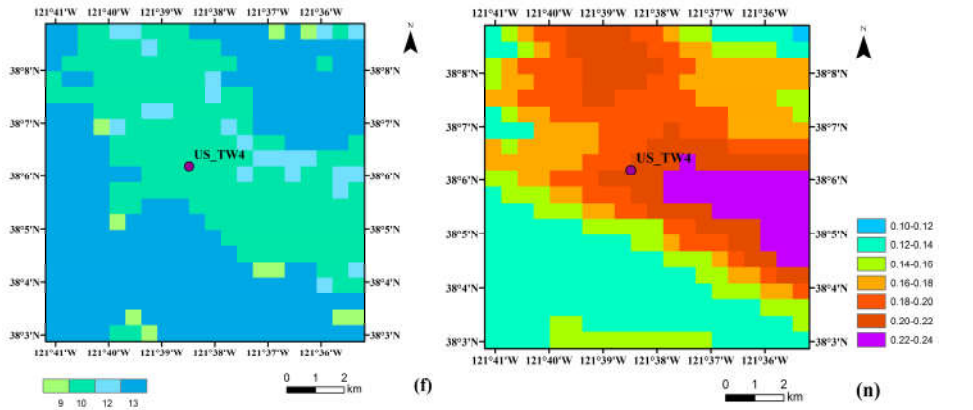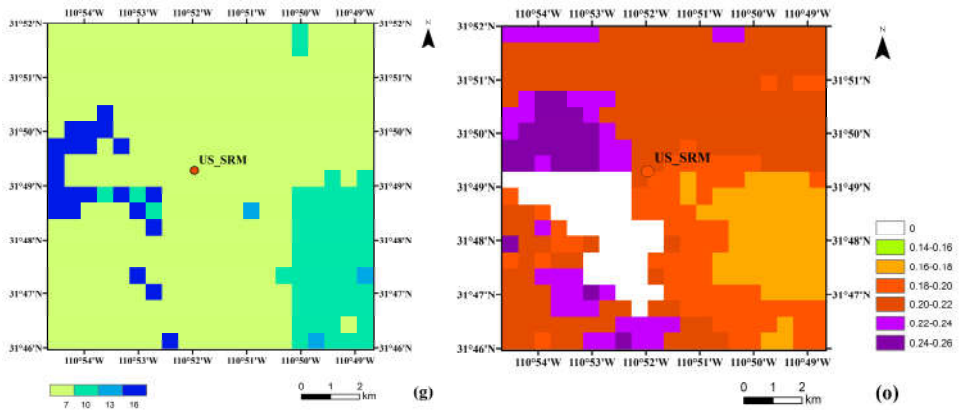

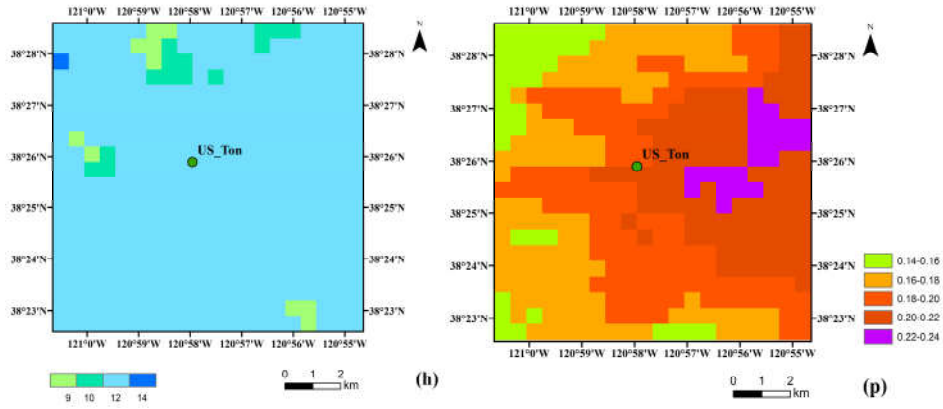

**Figure S1.** Land cover map from MCD12Q1 over US\_ARM (a), US\_TW3 (b), US\_NC2 (c), US\_A32 (d), US\_Srr (e), US\_TW4 (f), US\_SRM (g), US\_Ton (h) and MCD43A3 blue-sky albedo over US\_ARM (i), US\_TW3 (j), US\_NC2 (k), US\_A32 (l), US\_Srr (m), US\_TW4 (n), US\_SRM (o), US\_Ton (p) on 4th June, 2016. 1 indicates that the land cover type is ENF (Evergreen Needleleaf Forests), 4: DBF (Deciduous Broadleaf Forests), 5: MF (Mixed Forests), 7: OSH (Open Shrublands), 8: WSA (Woody Savannas), 9: SAV (Savannas), 10: GRA (Grasslands), 11: WET (Permanent Wetlands), 12: CRO (Croplands), 13: UBL (Urban and Built-up Lands), 14: CRO/NVM (Cropland/Natural Vegetation Mosaics), 16: Barren. The AmeriFlux sits are located at the center of each map.
